# Supplementary material
Source: PubMed Central journal article supplement (PMC11028901)
Supplement: 262_2017_2056_MOESM1_ESM.pdf [file 262_2017_2056_MOESM1_ESM.pdf]

**Supplementary Table s1: Primers' sequences**

| Gene          | Forward primer 5'-3'    | Reverse primer 5'-3'    | Tm | Reference      |
|---------------|-------------------------|-------------------------|----|----------------|
| <i>Arg-1</i>  | AACACGGCAGTGGCTTTAACC   | GGTTTTTCATGTGGCGCATTTC  | 59 | (1)            |
| <i>Pd-1</i>   | TTCAGGTTTACCACAAGCTGG   | TGACAATAGGAAACCGGGAA    | 58 | Designed by us |
| <i>IL-9</i>   | GGCATCAGAGACACCAATTACCT | TGGCATTGGTCAGCTGTAACA   | 59 | (2)            |
| <i>Il-1Ra</i> | CAAGCTGTGCCTGTCTTGTGC   | TGCTCAGATCAGTGATGTTAA   | 58 | Designed by us |
| <i>Ccl5</i>   | GCTGCTTTGCTACCTCTCC     | TCGAGTGACAAACACGACTGC   | 60 | (3)            |
| <i>Ido</i>    | CGGACTGAGAGGACACAGGTTAC | ACACATACGCCATGGTGATGTAC | 61 | (4)            |
| <i>Il-10</i>  | ATTTGAATCCCTGGGTGAGAAG  | CACAGGGGAGAAATCGATGACA  | 58 | (5)            |
| <i>Tnf-α</i>  | CTGTAGCCACGTCGTAGC      | TTGAGATCCATGCCGTTG      | 58 | (6)            |
| <i>Tgf-β1</i> | TGCTAATGGTGGACCGCAA     | CACTGCTCCCGAATGTCTGA    | 62 | (7)            |
| <i>Gapdh</i>  | GTGTTCTACCCCAATGTG      | GTCATTGAGAGCAATGCCAG    | 59 | (8)            |

**References:**

- Zhang T, Guo W, Yang Y et al. (2013) Loss of SHP-2 activity in CD4+ T cells promotes melanoma progression and metastasis. *Scientific reports*. 3: 2845. doi: 10.1038/srep02845
- Stordeur P, Poulin LF, Craciun L, Zhou L, Schandene L, de Lavarelle A, Goriely S, Goldman M (2002) Cytokine mRNA quantification by real-time PCR. *Journal of immunological methods*. 259: 55-64.
- Shukla PK, Chaudhry KK, Mir H, Gangwar R, Yadav N, Manda B, Meena AS, Rao R (2016) Chronic ethanol feeding promotes azoxymethane and dextran sulfate sodium-induced colonic tumorigenesis potentially by enhancing mucosal inflammation. *BMC cancer*. 16: 189. doi: 10.1186/s12885-016-2180-x
- Lee KJ, Moon JY, Choi HK et al. (2010) Immune regulatory effects of simvastatin on regulatory T cell-mediated tumour immune tolerance. *Clinical and experimental immunology*. 161: 298-305. doi: 10.1111/j.1365-2249.2010.04170.x
- Yee CS, Yao Y, Xu Q, McCarthy B, Sun-Lin D, Tone M, Waldmann H, Chang CH (2005) Enhanced production of IL-10 by dendritic cells deficient in CIITA. *J Immunol*. 174: 1222-9.
- Symonds EL, O'Mahony C, Laphorne S, O'Mahony D, Sharry JM, O'Mahony L, Shanahan F (2012) *Bifidobacterium infantis* 35624 protects against salmonella-induced reductions in digestive enzyme activity in mice by attenuation of the host inflammatory response. *Clinical and translational gastroenterology*. 3: e15. doi: 10.1038/ctg.2012.9
- Copple BL (2010) Hypoxia stimulates hepatocyte epithelial to mesenchymal transition by hypoxia-inducible factor and transforming growth factor-beta-dependent mechanisms. *Liver international : official journal of the International Association for the Study of the Liver*. 30: 669-82. doi: 10.1111/j.1478-3231.2010.02205.x
- Katsara O, Mahaira LG, Iliopoulou EG et al. (2011) Effects of donor age, gender, and in vitro cellular aging on the phenotypic, functional, and molecular characteristics of mouse bone marrow-derived mesenchymal stem cells. *Stem cells and development*. 20: 1549-61. doi: 10.1089/scd.2010.0280

**Supplementary Table s2:** Statistical comparisons between clones and lines regarding diameter, the ratio mass/diameter and diameter.

| DIAMETER      |              |              |              |              |              |              |              |
|---------------|--------------|--------------|--------------|--------------|--------------|--------------|--------------|
| Clone/line    | 13           | 15           | 17           | 22           | mix          | B16.F1       | B16.F10      |
| 13            |              | 0,500*       | 0,195        | <b>0,017</b> | 0,155        | <b>0,450</b> | <b>0,010</b> |
| 15            | 0,500        |              | 0,134        | <b>0,017</b> | 0,154        | <b>0,450</b> | <b>0,010</b> |
| 17            | 0,195        | 0,134        |              | 0,420        | 0,277        | 0,154        | 0,232        |
| 22            | <b>0,017</b> | <b>0,017</b> | 0,420        |              | 0,226        | <b>0,058</b> | <b>0,045</b> |
| mix           | 0,155        | 0,154        | 0,277        | 0,226        |              | 0,152        | <b>0,041</b> |
| B16.F1        | 0,450        | 0,450        | 0,154        | 0,058        | 0,152        |              | <b>0,018</b> |
| B16.F10       | <b>0,010</b> | <b>0,010</b> | 0,232        | <b>0,045</b> | <b>0,041</b> | <b>0,018</b> |              |
| MASS/DIAMETER |              |              |              |              |              |              |              |
| Clone/line    | 13           | 15           | 17           | 22           | mix          | B16.F1       | B16.F10      |
| 13            |              | 0,170        | 0,056        | 0,206        | 0,171        | <b>0,095</b> | <b>0,016</b> |
| 15            | 0,170        |              | <b>0,043</b> | 0,365        | 0,100        | 0,142        | <b>0,043</b> |
| 17            | 0,056        | <b>0,043</b> |              | <b>0,023</b> | 0,360        | 0,340        | 0,450        |
| 22            | 0,206        | 0,365        | <b>0,023</b> |              | <b>0,016</b> | <b>0,004</b> | <b>0,004</b> |
| mix           | 0,171        | 0,100        | 0,360        | <b>0,016</b> |              | 0,277        | <b>0,095</b> |
| B16.F1        | <b>0,095</b> | 0,142        | 0,340        | <b>0,004</b> | 0,277        |              | <b>0,018</b> |
| B16.F10       | <b>0,016</b> | <b>0,043</b> | 0,450        | <b>0,004</b> | <b>0,095</b> | <b>0,018</b> |              |
| MASS          |              |              |              |              |              |              |              |
| Clone/line    | 13           | 15           | 17           | 22           | mix          | B16.F1       | B16.F10      |
| 13            |              | 0,100        | 0,016        | 0,360        | <b>0,032</b> | <b>0,032</b> | 0,057        |
| 15            | 0,100        |              | 0,016        | 0,278        | <b>0,032</b> | <b>0,032</b> | <b>0,029</b> |
| 17            | 0,016        | 0,016        |              | 0,008        | 0,274        | 0,274        | 0,500        |
| 22            | 0,360        | 0,278        | 0,008        |              | <b>0,004</b> | <b>0,016</b> | 0,056        |
| mix           | <b>0,032</b> | <b>0,032</b> | 0,274        | <b>0,004</b> |              | 0,500        | 0,278        |
| B16.F1        | <b>0,032</b> | <b>0,032</b> | 0,274        | <b>0,016</b> | 0,500        |              | 0,278        |
| B16.F10       | 0,057        | <b>0,029</b> | 0,500        | 0,056        | 0,278        | 0,278        |              |

\* P values, Mann Whitney t test.

**Supplementary Table s3:** Statistical comparisons between clones and lines regarding different gene expression levels

| <i>Pd-1</i>  |              |               |              |              |              |              |              |
|--------------|--------------|---------------|--------------|--------------|--------------|--------------|--------------|
| Clone/line   | 13           | 15            | 17           | 22           | mix          | B16.F1       | B16.F10      |
| 13           |              | <b>0,014*</b> | 0,365        | 0,056        | <b>0,014</b> | <b>0,095</b> | <b>0,008</b> |
| 15           | <b>0,014</b> |               | 0,278        | 0,277        | <b>0,014</b> | <b>0,008</b> | <b>0,008</b> |
| 17           | 0,365        | 0,278         |              | 0,111        | <b>0,032</b> | <b>0,028</b> | <b>0,008</b> |
| 22           | 0,056        | 0,277         | 0,111        |              | <b>0,008</b> | <b>0,008</b> | <b>0,004</b> |
| mix          | <b>0,014</b> | <b>0,014</b>  | <b>0,032</b> | <b>0,008</b> |              | 0,365        | 0,056        |
| B16.F1       | <b>0,095</b> | <b>0,008</b>  | <b>0,028</b> | <b>0,008</b> | 0,365        |              | 0,421        |
| B16.F10      | <b>0,008</b> | <b>0,008</b>  | <b>0,008</b> | <b>0,004</b> | 0,056        | 0,421        |              |
| <i>Il-10</i> |              |               |              |              |              |              |              |
| Clone/line   | 13           | 15            | 17           | 22           | mix          | B16.F1       | B16.F10      |
| 13           |              | 0,100         | 0,142        | 0,277        | <b>0,014</b> | 0,278        | 0,368        |
| 15           | 0,100        |               | 0,095        | 0,365        | <b>0,014</b> | 0,056        | 0,056        |
| 17           | 0,142        | 0,095         |              | 0,075        | 0,556        | 0,345        | 0,154        |
| 22           | 0,277        | 0,365         | 0,075        |              | <b>0,008</b> | 0,154        | 0,210        |
| mix          | <b>0,014</b> | <b>0,014</b>  | 0,556        | <b>0,008</b> |              | <b>0,032</b> | <b>0,032</b> |
| B16.F1       | 0,278        | 0,056         | 0,345        | 0,154        | <b>0,032</b> |              | 0,500        |
| B16.F10      | 0,368        | 0,056         | 0,154        | 0,021        | <b>0,032</b> | 0,500        |              |
| <i>Il-9</i>  |              |               |              |              |              |              |              |
| Clone/line   | 13           | 15            | 17           | 22           | mix          | B16.F1       | B16.F10      |
| 13           |              | 0,100         | 0,056        | 0,452        | 0,242        | 0,500        | 0,277        |
| 15           | 0,100        |               | 0,365        | 0,206        | 0,171        | 0,365        | 0,278        |
| 17           | 0,056        | 0,365         |              | 0,345        | 0,095        | 0,273        | 0,155        |
| 22           | 0,452        | 0,206         | 0,345        |              | 0,500        | 0,420        | 0,500        |
| mix          | 0,242        | 0,171         | 0,095        | 0,500        |              | 0,500        | 0,452        |
| B16.F1       | 0,500        | 0,365         | 0,273        | 0,420        | 0,500        |              | 0,421        |
| B16.F10      | 0,277        | 0,278         | 0,155        | 0,500        | 0,452        | 0,421        |              |
| <i>Tnf-α</i> |              |               |              |              |              |              |              |
| Clone/line   | 13           | 15            | 17           | 22           | mix          | B16.F1       | B16.F10      |
| 13           |              | 0,242         | <b>0,008</b> | 0,206        | 0,242        | 0,277        | 0,095        |
| 15           | 0,242        |               | <b>0,032</b> | 0,095        | 0,242        | 0,206        | 0,095        |
| 17           | <b>0,008</b> | <b>0,032</b>  |              | 0,377        | 0,095        | 0,210        | 0,154        |
| 22           | 0,206        | 0,095         | 0,377        |              | 0,206        | 0,345        | 0,421        |
| Mix          | 0,242        | 0,242         | 0,095        | 0,206        |              | 0,452        | 0,365        |
| B16.F1       | 0,277        | 0,206         | 0,210        | 0,345        | 0,453        |              | 0,500        |
| B16.F10      | 0,095        | 0,095         | 0,154        | 0,421        | 0,365        | 0,500        |              |

| <i>Ccl5</i>   |              |              |              |              |              |              |              |
|---------------|--------------|--------------|--------------|--------------|--------------|--------------|--------------|
| Clone/line    | 13           | 15           | 17           | 22           | mix          | B16.F1       | B16.F10      |
| 13            |              | 0,242        | <b>0,032</b> | 0,277        | <b>0,014</b> | 0,277        | <b>0,043</b> |
| 15            | 0,242        |              | <b>0,016</b> | 0,206        | <b>0,014</b> | 0,095        | <b>0,016</b> |
| 17            | <b>0,032</b> | <b>0,016</b> |              | 0,075        | 0,095        | 0,273        | 0,500        |
| 22            | 0,277        | 0,206        | 0,075        |              | <b>0,032</b> | 0,420        | 0,154        |
| Mix           | <b>0,014</b> | <b>0,014</b> | 0,095        | <b>0,032</b> |              | <b>0,032</b> | 0,056        |
| B16.F1        | 0,277        | 0,095        | 0,273        | 0,420        | <b>0,032</b> |              | 0,173        |
| B16.F10       | <b>0,043</b> | <b>0,016</b> | 0,500        | 0,154        | 0,056        | 0,173        |              |
| <i>Il-1ra</i> |              |              |              |              |              |              |              |
| Clone/line    | 13           | 15           | 17           | 22           | mix          | B16.F1       | B16.F10      |
| 13            |              | 0,442        | 0,095        | 0,206        | 0,100        | 0,500        | 0,160        |
| 15            | 0,442        |              | 0,277        | 0,277        | 0,171        | 0,452        | 0,142        |
| 17            | 0,095        | 0,277        |              | 0,154        | 0,365        | 0,420        | 0,500        |
| 22            | 0,206        | 0,277        | 0,154        |              | 0,095        | 0,154        | <b>0,048</b> |
| mix           | 0,100        | 0,171        | 0,365        | 0,095        |              | 0,206        | 0,500        |
| B16.F1        | 0,500        | 0,452        | 0,420        | 0,154        | 0,206        |              | 0,104        |
| B16.F10       | 0,160        | 0,142        | 0,500        | <b>0,048</b> | 0,500        | 0,104        |              |
| <i>Arg</i>    |              |              |              |              |              |              |              |
| Clone/line    | 13           | 15           | 17           | 22           | mix          | B16.F1       | B16.F10      |
| 13            |              | 0,171        | 0,230        | 0,206        | 0,342        | 0,452        | 0,365        |
| 15            | 0,171        |              | 0,277        | 0,360        | 0,057        | 0,095        | <b>0,032</b> |
| 17            | 0,230        | 0,277        |              | 0,345        | 0,056        | 0,155        | 0,210        |
| 22            | 0,206        | 0,360        | 0,345        |              | 0,095        | 0,345        | 0,274        |
| mix           | 0,342        | 0,057        | 0,056        | 0,095        |              | 0,452        | 0,278        |
| B16.F1        | 0,452        | 0,095        | 0,155        | 0,345        | 0,452        |              | 0,210        |
| B16.F10       | 0,365        | <b>0,032</b> | 0,210        | 0,274        | 0,278        | 0,210        |              |
| <i>Tgfβ</i>   |              |              |              |              |              |              |              |
| Clone/line    | 13           | 15           | 17           | 22           | mix          | B16.F1       | B16.F10      |
| 13            |              | <b>0,041</b> | 0,206        | 0,402        | 0,500        | 0,095        | <b>0,032</b> |
| 15            | <b>0,041</b> |              | 0,277        | 0,365        | 0,057        | 0,278        | 0,278        |
| 17            | 0,206        | 0,277        |              | 0,500        | 0,277        | 0,450        | 0,345        |
| 22            | 0,402        | 0,365        | 0,500        |              | 0,452        | 0,421        | 0,345        |
| mix           | 0,500        | 0,057        | 0,277        | 0,452        |              | 0,206        | 0,055        |
| B16.F1        | 0,095        | 0,278        | 0,450        | 0,421        | 0,206        |              | 0,274        |
| B16.F10       | <b>0,032</b> | 0,278        | 0,345        | 0,345        | 0,055        | 0,274        |              |
| <i>Ido</i>    |              |              |              |              |              |              |              |
| Clone/line    | 13           | 15           | 17           | 22           | mix          | B16.F1       | B16.F10      |
| 13            |              | <b>0,028</b> | 0,095        | 0,095        | 0,342        | 0,277        | 0,452        |
| 15            | <b>0,028</b> |              | 0,452        | 0,500        | 0,057        | 0,230        | 0,095        |
| 17            | 0,095        | 0,452        |              | 0,500        | 0,056        | 0,210        | 0,111        |
| 22            | 0,095        | 0,500        | 0,500        |              | 0,206        | 0,273        | 0,155        |
| mix           | 0,342        | 0,057        | 0,056        | 0,206        |              | 0,500        | 0,500        |
| B16.F1        | 0,277        | 0,230        | 0,210        | 0,273        | 0,500        |              | 0,273        |
| B16.F10       | 0,452        | 0,095        | 0,111        | 0,155        | 0,500        | 0,273        |              |

\* P values, Mann Whitney t test

**Supplementary Table s4:** Statistical comparisons between clones and lines regarding CD45, CD3, CD4, CD8 infiltration and the ratio of CD4/CD8

| CD45       |       |              |              |              |              |              |              |
|------------|-------|--------------|--------------|--------------|--------------|--------------|--------------|
| Clone/line | 13    | 15           | 17           | 22           | mix          | B16.F1       | B16.F10      |
| 13         |       | 0,243*       | 0,278        | 0,143        | 0,057        | 0,095        | 0,032        |
| 15         | 0,243 |              | 0,143        | 0,452        | 0,014        | 0,008        | 0,008        |
| 17         | 0,278 | 0,143        |              | 0,111        | <b>0,008</b> | <b>0,004</b> | <b>0,004</b> |
| 22         | 0,143 | 0,452        | 0,111        |              | <b>0,008</b> | <b>0,040</b> | <b>0,040</b> |
| mix        | 0,057 | 0,014        | <b>0,008</b> | <b>0,008</b> |              | 0,278        | 0,278        |
| B16.F1     | 0,095 | 0,008        | <b>0,004</b> | <b>0,040</b> | 0,278        |              | 0,210        |
| B16.F10    | 0,032 | 0,008        | <b>0,004</b> | <b>0,040</b> | 0,278        | 0,210        |              |
| CD3        |       |              |              |              |              |              |              |
| Clone/line | 13    | 15           | 17           | 22           | mix          | B16.F1       | B16.F10      |
| 13         |       | 0,243        | 0,452        | 0,143        | 0,057        | 0,056        | 0,032        |
| 15         | 0,243 |              | 0,143        | 0,278        | <b>0,014</b> | <b>0,008</b> | <b>0,008</b> |
| 17         | 0,452 | 0,143        |              | 0,155        | <b>0,008</b> | <b>0,004</b> | <b>0,004</b> |
| 22         | 0,143 | 0,278        | 0,155        |              | <b>0,008</b> | <b>0,004</b> | <b>0,004</b> |
| mix        | 0,057 | <b>0,014</b> | <b>0,008</b> | <b>0,008</b> |              | 0,365        | 0,278        |
| B16.F1     | 0,056 | <b>0,008</b> | <b>0,004</b> | <b>0,004</b> | 0,365        |              | 0,345        |
| B16.F10    | 0,032 | <b>0,008</b> | <b>0,004</b> | <b>0,004</b> | 0,278        | 0,345        |              |
| CD4        |       |              |              |              |              |              |              |
| Clone/line | 13    | 15           | 17           | 22           | mix          | B16.F1       | B16.F10      |
| 13         |       | 0,243        | 0,365        | 0,365        | <b>0,029</b> | <b>0,032</b> | 0,056        |
| 15         | 0,243 |              | 0,206        | 0,278        | <b>0,014</b> | <b>0,008</b> | 0,008        |
| 17         | 0,365 | 0,206        |              | 0,421        | <b>0,008</b> | <b>0,004</b> | 0,008        |
| 22         | 0,365 | 0,278        | 0,421        |              | <b>0,007</b> | <b>0,004</b> | 0,004        |
| mix        | 0,029 | <b>0,014</b> | <b>0,008</b> | <b>0,007</b> |              | 0,452        | 0,365        |
| B16.F1     | 0,032 | <b>0,008</b> | <b>0,004</b> | <b>0,004</b> | 0,452        |              | 0,421        |
| B16.F10    | 0,056 | <b>0,008</b> | <b>0,008</b> | <b>0,004</b> | 0,365        | 0,421        |              |
| CD8        |       |              |              |              |              |              |              |
| Clone/line | 13    | 15           | 17           | 22           | mix          | B16.F1       | B16.F10      |
| 13         |       | 0,243        | 0,452        | 0,143        | 0,057        | 0,056        | 0,032        |
| 15         | 0,243 |              | 0,206        | 0,500        | <b>0,014</b> | <b>0,008</b> | <b>0,008</b> |
| 17         | 0,452 | 0,206        |              | <b>0,048</b> | <b>0,008</b> | <b>0,004</b> | <b>0,004</b> |
| 22         | 0,143 | 0,500        | <b>0,048</b> |              | <b>0,008</b> | <b>0,004</b> | <b>0,004</b> |
| mix        | 0,057 | <b>0,014</b> | <b>0,008</b> | <b>0,008</b> |              | 0,500        | 0,143        |
| B16.F1     | 0,056 | <b>0,008</b> | <b>0,004</b> | <b>0,004</b> | 0,500        |              | 0,210        |
| B16.F10    | 0,032 | <b>0,008</b> | <b>0,004</b> | <b>0,004</b> | 0,143        | 0,210        |              |
| CD4/CD8    |       |              |              |              |              |              |              |
| Clone/line | 13    | 15           | 17           | 22           | mix          | B16.F1       | B16.F10      |
| 13         |       | 0,500        | 0,500        | 0,143        | 0,343        | 0,453        | 0,032        |
| 15         | 0,500 |              | 0,500        | 0,133        | 0,243        | 0,452        | 0,143        |
| 17         | 0,500 | 0,500        |              | 0,210        | 0,278        | 0,500        | 0,075        |
| 22         | 0,143 | 0,133        | 0,210        |              | 0,452        | 0,155        | <b>0,004</b> |
| mix        | 0,343 | 0,243        | 0,278        | 0,452        |              | 0,278        | <b>0,032</b> |
| B16.F1     | 0,453 | 0,452        | 0,500        | 0,155        | 0,278        |              | <b>0,048</b> |
| B16.F10    | 0,032 | 0,143        | 0,075        | <b>0,004</b> | <b>0,032</b> | <b>0,048</b> |              |

\* P values, Mann Whitney t test.
